# Supplementary material
Source: PubMed Central journal article supplement (PMC2676344)
Supplement: NIHMS109074-supplement-10_-_Supp_Fig_Legend.pdf [file NIHMS109074-supplement-10_-_Supp_Fig_Legend.pdf]

## **Supplemental Figure 1.**

### **T-cadherin null mice display unaltered epithelial ductal outgrowth and branching**

*A*, examples of number 4 mammary gland whole mounts from T-cadherin<sup>-/-</sup> and T-cadherin<sup>+/+</sup> mice at 3, 5 and 8 weeks of age (n = 3 for each timepoint). *B*, quantification of ductal branching from 3 mice of each genotype revealed no apparent differences.

## **Supplemental Figure 2.**

### **Impaired hypoxia-induced retinal neovascularization in T-cadherin null mice.**

BSL1-B4 staining of whole mounted hypoxic retinae show the angiogenic response in T-cadherin<sup>+/+</sup> (*A*) and decreased retinal angiogenesis T-cadherin<sup>-/-</sup> (*B*) mice. Scale bar 400  $\mu$ m. Quantitative analyses reveal in *C*, a 63% reduction of proliferative glomeruli (white arrows); and in *D*, a 53% reduction in vessel branching in T-cadherin<sup>-/-</sup> mice in comparison to the wild type.
