# Supplementary material
Source: PubMed Central journal article supplement (PMC2676344)

# Supplemental Figure 1

**A**

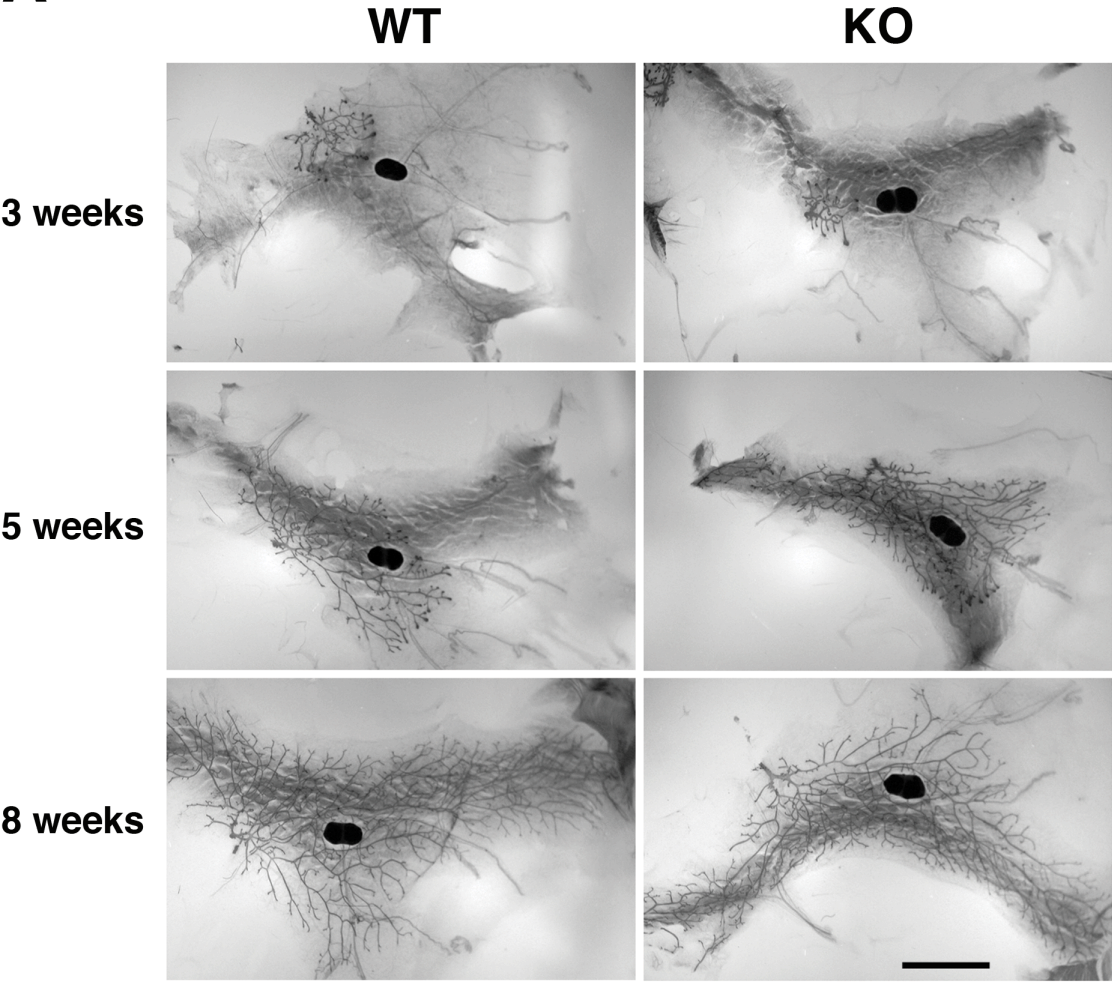

**B**

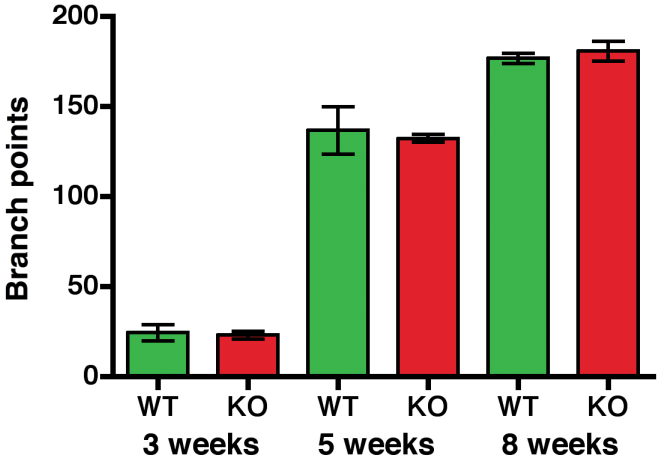

Supplement: NIHMS109074-supplement-11_-_Supp_Fig_1.pdf [file NIHMS109074-supplement-11_-_Supp_Fig_1.pdf]
